# Supplementary material for: Usefulness of the Hybrid RFR-FFR Approach: Results of a Prospective and Multicenter Analysis of Diagnostic Agreement between RFR and FFR—The RECOPA (REsting Full-Cycle Ratio Comparation versus Fractional Flow Reserve (A Prospective Validation)) Study
Source: Hindawi journal article supplement (doi:10.1155/2021/5522707), 2021-03-31
Supplement: f1 [file 5522707.f1.zip]

**Supplementary Material 3: Sensitivity and specificity analyses for overall cohort and stratified by the route of adenosine administration [RFR ( $\leq 0.89$ ) and FFR ( $\leq 0.80$ )].**

A: Overall cohort (380 lesions).

|                        |  | FFR                |                |
|------------------------|--|--------------------|----------------|
| ## RFR                 |  | pos ( $\leq 0.8$ ) | neg ( $>0.8$ ) |
| ## pos ( $\leq 0.89$ ) |  | 104                | 48             |
| ## neg ( $>0.89$ )     |  | 32                 | 196            |

  

|           | Outcome + | Outcome - | Total |
|-----------|-----------|-----------|-------|
| ## Test + | 104       | 48        | 152   |
| ## Test - | 32        | 196       | 228   |
| ## Total  | 136       | 244       | 380   |

## Point estimates and 95 % CIs:

|                              |                   |
|------------------------------|-------------------|
| ## Apparent prevalence       | 0.40 (0.35, 0.45) |
| ## True prevalence           | 0.36 (0.31, 0.41) |
| ## Sensitivity               | 0.76 (0.68, 0.83) |
| ## Specificity               | 0.80 (0.75, 0.85) |
| ## Positive predictive value | 0.68 (0.60, 0.76) |
| ## Negative predictive value | 0.86 (0.81, 0.90) |
| ## Positive likelihood ratio | 3.89 (2.97, 5.09) |
| ## Negative likelihood ratio | 0.29 (0.21, 0.40) |

B: Intracoronary adenosine (255 lesions).

|                        |  | FFR                |                |
|------------------------|--|--------------------|----------------|
| ## RFR                 |  | pos ( $\leq 0.8$ ) | neg ( $>0.8$ ) |
| ## pos ( $\leq 0.89$ ) |  | 73                 | 28             |
| ## neg ( $>0.89$ )     |  | 20                 | 134            |

  

|           | Outcome + | Outcome - | Total |
|-----------|-----------|-----------|-------|
| ## Test + | 73        | 28        | 101   |
| ## Test - | 20        | 134       | 154   |
| ## Total  | 93        | 162       | 255   |

## Point estimates and 95 % CIs:

|                              |                   |
|------------------------------|-------------------|
| ## Apparent prevalence       | 0.40 (0.34, 0.46) |
| ## True prevalence           | 0.36 (0.31, 0.43) |
| ## Sensitivity               | 0.78 (0.69, 0.86) |
| ## Specificity               | 0.83 (0.76, 0.88) |
| ## Positive predictive value | 0.72 (0.62, 0.81) |
| ## Negative predictive value | 0.87 (0.81, 0.92) |
| ## Positive likelihood ratio | 4.54 (3.19, 6.47) |
| ## Negative likelihood ratio | 0.26 (0.18, 0.39) |

C: Endovenous adenosine (125 lesions).

```
##          FFR
## RFR      pos (<=0.8) neg (>0.8)
## pos (<=0.89)      31      20
## neg (>0.89)       12      62
```

```
##          Outcome +   Outcome -   Total
## Test +           31           20      51
## Test -           12           62      74
## Total            43           82     125
##
## Point estimates and 95 % CIs:
## -----
## Apparent prevalence           0.41 (0.32, 0.50)
## True prevalence               0.34 (0.26, 0.43)
## Sensitivity                   0.72 (0.56, 0.85)
## Specificity                   0.76 (0.65, 0.84)
## Positive predictive value     0.61 (0.46, 0.74)
## Negative predictive value     0.84 (0.73, 0.91)
## Positive likelihood ratio     2.96 (1.93, 4.52)
## Negative likelihood ratio     0.37 (0.22, 0.61)
## -----
```
