# Supplementary material for: Usefulness of the Hybrid RFR-FFR Approach: Results of a Prospective and Multicenter Analysis of Diagnostic Agreement between RFR and FFR—The RECOPA (REsting Full-Cycle Ratio Comparation versus Fractional Flow Reserve (A Prospective Validation)) Study
Source: J Interv Cardiol. 2021 Mar 31;2021:5522707. doi: 10.1155/2021/5522707 (PMC8026323; doi:10.1155/2021/5522707)
Supplement: Supplementary Materials — Supplementary Material 1: general recommendations for FFR and RFR measurements (modified from Achenbach et al. [28] and Svanerud et al. [8]). FFR, fractional flow reserve; RFR, resting full-cycle ratio; Pd, distal pressure; Pa, aortic pressure. Supplementary Material 2: segments affected according to syntax classification. RCA, right coronary artery; LAD, left anterior descending artery; LCx, left circumflex artery. Supplementary Material 3: sensitivity and specificity analyses for overall cohort and stratified by the route of adenosine administration (RFR (≤0.89) and FFR (≤0.80)). A: overall cohort (380 lesions). B: intracoronary adenosine (255 lesions). C: endovenous adenosine (125 lesions). [file 5522707.f1.zip]

Archive with 3 entries (3 files):
- 5522707.f1/DEFINITIVE RECOPA SUPLEMENTARY MATERIAL 1.docx
- 5522707.f1/DEFINITIVE RECOPA SUPLEMENTARY MATERIAL 2.docx
- 5522707.f1/DEFINITIVE RECOPA SUPLEMENTARY MATERIAL 3 REBUTTAL PDF.pdf
